# Supplementary material
Source: MDPI journal article supplement (https://www.mdpi.com/2072-4292/14/1/200)
Supplement: s1 [file s1 › remotesensing-1511661-supplementary.pdf]

## Supplementary materials

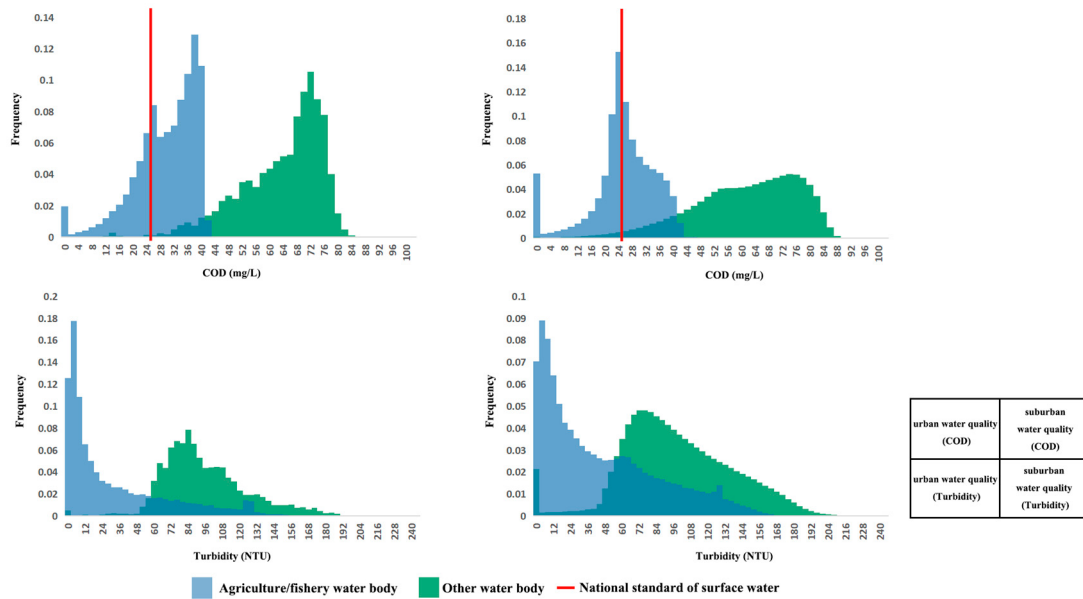

Figure S1. Frequency histograms of water quality inversion on March 22, 2020 for urban (left) and suburban (right) water bodies. Blue is 'agriculture/fishery' water bodies, green is 'other' water bodies.

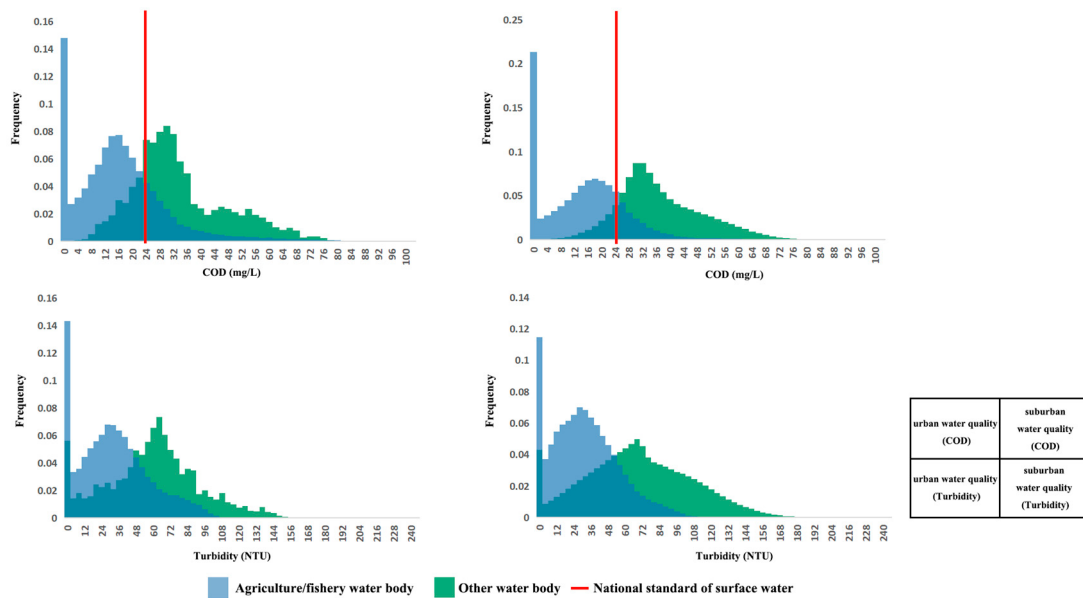

Figure S2. Frequency histograms of water quality inversion on January 04, 2021 for urban (left) and suburban (right) water bodies. Blue is 'agriculture/fishery' water bodies, green is 'other' water bodies.

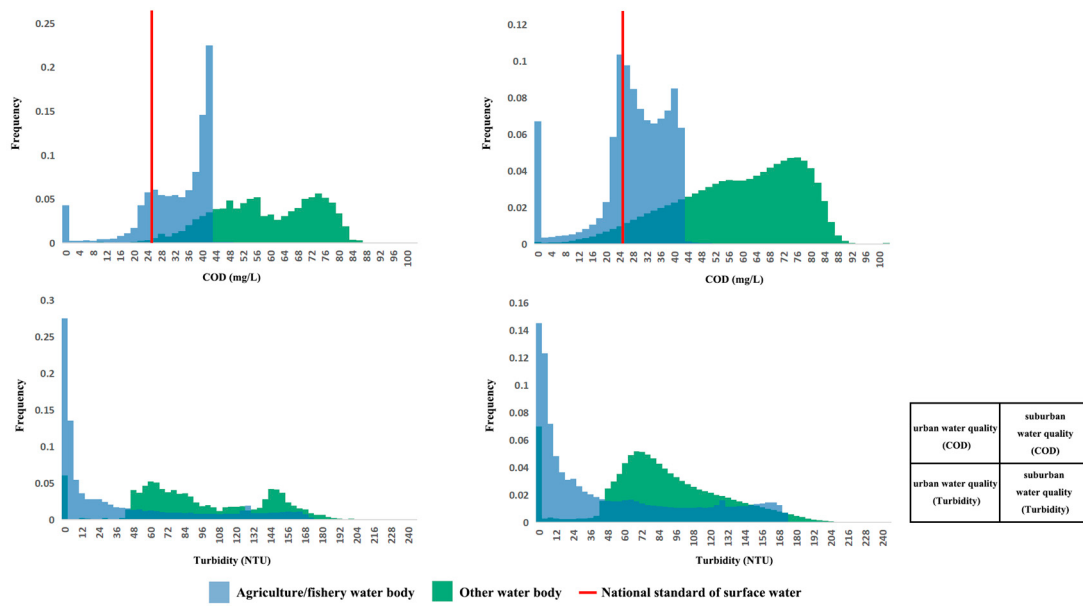

Figure S3. Frequency histograms of water quality inversion on March 25, 2021 for urban (left) and suburban (right) water bodies. Blue is 'agriculture/fishery' water bodies, green is 'other' water bodies.
